# Supplementary material for: Electrostatic Screening, Acidic pH and Macromolecular Crowding Increase the Self-Assembly Efficiency of the Minute Virus of Mice Capsid In Vitro
Source: MDPI journal article supplement (doi:10.3390/v15051054), 2023-04-25
Supplement: s1 [file s1]

## **Supplementary Material**

### **Electrostatic Screening, Acidic pH and Macromolecular Crowding Increase the Self-Assembly Efficiency of the Minute Virus of Mice Capsid *in Vitro***

Miguel Angel Fuertes, Diego López Mateos, Luis Valiente, Alicia Rodríguez Huete, Alejandro Valbuena\* and Mauricio G. Mateu\*

Centro de Biología Molecular "Severo Ochoa", Universidad Autónoma de Madrid, Cantoblanco, 28049 Madrid, Spain

\* Authors for correspondence. E-mail: [mgarcia@cbm.csic.es](mailto:mgarcia@cbm.csic.es); [avalbuena@cbm.csic.es](mailto:avalbuena@cbm.csic.es)

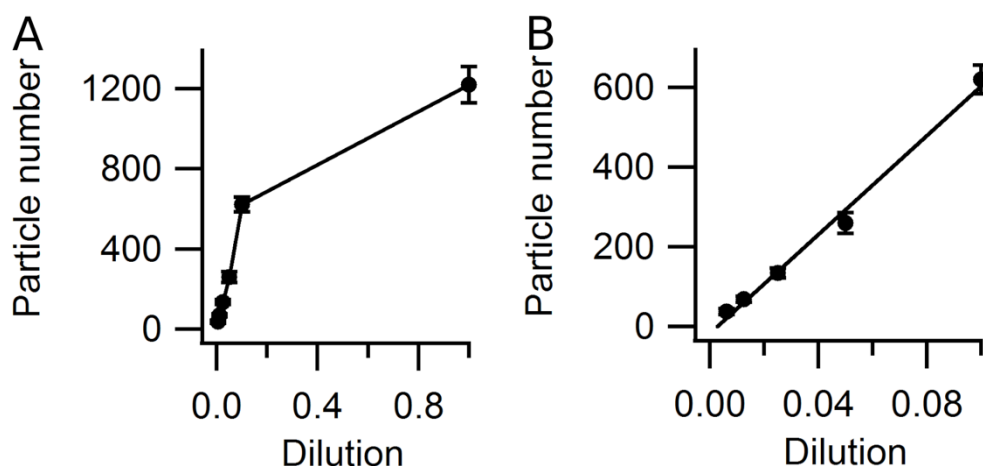

**Figure S1.** VLP counts by TEM as a function of the dilution of a concentrated VLP suspension. (A) full tested range, from 1/300 dilution to 1 (undiluted). (B) Linear part of the tested range, from 1/300 to 1/10 dilution ( $r^2=0.99$ ).

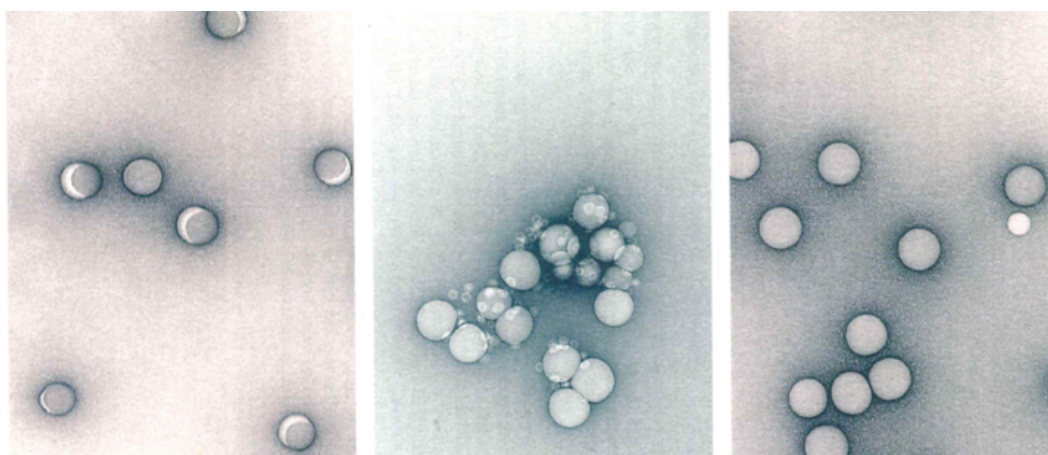

**Figure S2.** Clustering of latex beads through adsorption of MVM VLPs to the beads and to each other. (A) monodisperse latex beads. (B) clustered beads after addition of purified native VLPs; many VLPs can be seen adsorbed on the bead surface (C) monodisperse beads after dissociation of the VLPs by addition of 4M GdmHCl.

**Video S1.** Calculated electrostatic potentials represented on the MVM capsid trimer surface as a function of ionic strength.

**Video S2.** Calculated electrostatic potentials represented on the MVM capsid trimer surface as a function of pH.
